# Supplementary material for: A decade of human metapneumovirus in hospitalized children with acute respiratory infection: molecular epidemiology in central Vietnam, 2007–2017
Source: PubMed Central journal article supplement (PMC10514255; doi:10.1038/s41598-023-42692-z), 2023-09-21
Supplement: 41598_2023_42692_MOESM1_ESM.pdf [file 41598_2023_42692_MOESM1_ESM.pdf]

## Supplementary Materials

**Article Title:** A decade of human metapneumovirus in hospitalized children with acute respiratory infection: Molecular epidemiology in central Vietnam, 2007-2017

### **Authors and Affiliations:**

Hirono Otomaru<sup>1</sup>, Hien Anh Thi Nguyen<sup>2</sup>, Hien Minh Vo<sup>3</sup>, Michiko Toizumi<sup>1</sup>, Minh Nhat Le<sup>4,5</sup>, Katsumi Mizuta<sup>6</sup>, Hiroyuki Moriuchi<sup>7</sup>, Minh Xuan Bui<sup>8</sup>, Duc Anh Dang<sup>9</sup>, and Lay-Myint Yoshida<sup>1,10</sup>

1. Department of Pediatric Infectious Diseases, Institute of Tropical Medicine, Nagasaki University, Nagasaki, Japan
2. Department of Bacteriology, National Institute of Hygiene and Epidemiology, Hanoi, Vietnam
3. Department of Pediatrics, Khanh Hoa General Hospital, Nha Trang, Vietnam
4. Antimicrobial Resistance Research Centre, National Institute of Infectious Disease (NIID), Shinjuku, Japan
5. Tay Nguyen Institute of Science Research, Vietnam Academy of Science and Technology (VAST), Da Lat, Vietnam
6. Yamagata Prefectural Institute of Public Health, Yamagata, Japan
7. Department of Pediatrics, Nagasaki University Graduate School of Biomedical Sciences, Nagasaki, Japan
8. Khanh Hoa Health Service Department, Nha Trang, Vietnam
9. National Institute of Hygiene and Epidemiology, Hanoi, Vietnam
10. Graduate School of Biomedical Sciences, Nagasaki University, Nagasaki, Japan

### **Subgroup, genotype, and sublineage classification of hMPV**

HMPV subgroup A and B were further classified into genotypes A1, A2, B1, and B2 based on genetic differences in a previous report [1]. A recent study reported that hMPV A2 can be further categorized into several branches, A2a, A2b, and A2c, according to F gene phylogenetic analysis [2].

Furthermore, variants with 180- or 111-nucleotide duplication in the G gene were found to be included in the A2c branch in phylogenetic analysis of the F and G gene [3–5]. We therefore differentiated hMPV A2a, A2b, and A2c as sublineages of genotype A2 in our analysis. To classify the obtained sequences into these genotypes and sublineages, we conducted a phylogenetic analysis with reference sequences. The hMPV F gene sequences were aligned with the Clustal W algorithm implemented within *msa* package [6] in R version 4.1.2 [7]. Accession numbers in GeneBank of the representative reference sequences used for classification were AF371337 (A1), AB503857 (A2a), AY530095 (A2b), GQ153651 (A2c), AY525843 (B1), and FJ168778 (B2) [8]. Accession numbers in GeneBank of our sequences for representatives in genotypes and sublineages are OP947591–OP947594. Samples that failed to be amplified were classified as genotype undetermined.

## References

1. Ishiguro N, Ebihara T, Endo R, et al. High genetic diversity of the attachment (G) protein of human metapneumovirus. *J Clin Microbiol.* **2004**; 42(8):3406–3414.
2. Nidaira M, Taira K, Hamabata H, et al. Molecular epidemiology of human metapneumovirus from 2009 to 2011 in Okinawa, Japan. *Jpn J Infect Dis.* **2012**; 65(4):337–340.
3. Piñana M, Vila J, Gimferrer L, et al. Novel human metapneumovirus with a 180-nucleotide duplication in the G gene. *Future Microbiol.* **2017**; 12(7):565–571.
4. Saikusa M, Nao N, Kawakami C, et al. A novel 111-nucleotide duplication in the G gene of human metapneumovirus. *Microbiol Immunol.* **2017**; 61(11):507–512.
5. Piñana M, Vila J, Maldonado C, et al. Insights into immune evasion of human metapneumovirus: novel 180- and 111-nucleotide duplications within viral G gene throughout 2014-2017 seasons in Barcelona, Spain. *J Clin Virol.* **2020**; 132:104590.
6. Bodenhofer U, Bonatesta E, Horejš-Kainrath C, Hochreiter S. msa: an R package for multiple sequence alignment. *Bioinformatics.* **2015**; 31(24):3997–3999.
7. R Core Team. R: A language and environment for statistical computing [Internet]. Vienna, Austria: R Foundation for Statistical Computing; 2021. Available from: <https://www.R-project.org/>
8. Oketch JW, Kamau E, Otieno GP, Otieno JR, Agoti CN, Nokes DJ. Human metapneumovirus prevalence and patterns of subgroup persistence identified through surveillance of pediatric pneumonia hospital admissions in coastal Kenya, 2007–2016. *BMC Infect Dis.* **2019**; 19(1):757.

**Supplementary Table 1. Clinical features of patients with hMPV**

| Supplementary Table 1                  |                   |                  |                      |                   |                    |                      |
|----------------------------------------|-------------------|------------------|----------------------|-------------------|--------------------|----------------------|
| Characteristics                        | hMPV vs RSV       |                  |                      | hMPV vs Non-RSV   |                    |                      |
|                                        | hMPV, N = 278     | RSV, N = 1,671   | p-value <sup>a</sup> | hMPV, N = 278     | Non-RSV, N = 6,873 | p-value <sup>b</sup> |
| <b>Age Month (Median (IQR))</b>        | 21.0 (12.7, 32.5) | 13.9 (6.8, 22.6) | <0.001               | 21.0 (12.7, 32.5) | 17.9 (9.6, 30.1)   | 0.011                |
| <b>Age Group (n (%))</b>               |                   |                  | <0.001               |                   |                    | <0.001               |
| 1-5mo                                  | 13 (4.7%)         | 24 (1.4%)        |                      | 13 (4.7%)         | 578 (8.4%)         |                      |
| 6-11mo                                 | 29 (10.4%)        | 363 (21.7%)      |                      | 29 (10.4%)        | 926 (13.5%)        |                      |
| 12-23mo                                | 93 (33.5%)        | 577 (34.5%)      |                      | 93 (33.5%)        | 2,252 (32.8%)      |                      |
| 24-35mo                                | 69 (24.8%)        | 252 (15.1%)      |                      | 69 (24.8%)        | 1,111 (16.2%)      |                      |
| 36-47mo                                | 22 (7.9%)         | 70 (4.2%)        |                      | 22 (7.9%)         | 485 (7.1%)         |                      |
| 48-59mo                                | 16 (5.8%)         | 18 (1.1%)        |                      | 16 (5.8%)         | 242 (3.5%)         |                      |
| ≥60mo                                  | 36 (12.9%)        | 367 (22.0%)      |                      | 36 (12.9%)        | 1,279 (18.6%)      |                      |
| <b>Sex (n (%))</b>                     |                   |                  | 0.2                  |                   |                    | 0.2                  |
| Male                                   | 152 (54.7%)       | 980 (58.6%)      |                      | 152 (54.7%)       | 4,023 (58.5%)      |                      |
| Female                                 | 126 (45.3%)       | 691 (41.4%)      |                      | 126 (45.3%)       | 2,850 (41.5%)      |                      |
| <b>Cough (n (%))</b>                   | 277 (99.6%)       | 1,667 (99.8%)    | 0.5                  | 277 (99.6%)       | 6,847 (99.6%)      | >0.9                 |
| <b>Difficulty of Breathing (n (%))</b> | 98 (35.3%)        | 579 (34.6%)      | 0.8                  | 98 (35.3%)        | 1,729 (25.2%)      | <0.001               |
| <b>Tachypnea (n (%))</b>               | 201 (72.3%)       | 1,314 (78.6%)    | 0.019                | 201 (72.3%)       | 5,653 (82.2%)      | <0.001               |
| <b>Chest Indrawing (n (%))</b>         | 18 (6.5%)         | 134 (8.0%)       | 0.4                  | 18 (6.5%)         | 299 (4.4%)         | 0.092                |
| <b>Stridor (n (%))</b>                 | 4 (1.4%)          | 17 (1.0%)        | 0.5                  | 4 (1.4%)          | 111 (1.6%)         | >0.9                 |
| <b>Wheeze (n (%))</b>                  | 150 (54.0%)       | 935 (56.0%)      | 0.5                  | 150 (54.0%)       | 3,017 (43.9%)      | <0.001               |
| <b>Crackle (n (%))</b>                 | 52 (18.7%)        | 292 (17.5%)      | 0.6                  | 52 (18.7%)        | 785 (11.4%)        | <0.001               |
| <b>Clinical Pneumonia (n (%))</b>      |                   |                  | 0.10                 |                   |                    | <0.001               |

Supplementary Table 1

| Characteristics                                         | hMPV vs RSV    |                |                      | hMPV vs Non-RSV |                    |                      |
|---------------------------------------------------------|----------------|----------------|----------------------|-----------------|--------------------|----------------------|
|                                                         | hMPV, N = 278  | RSV, N = 1,671 | p-value <sup>a</sup> | hMPV, N = 278   | Non-RSV, N = 6,873 | p-value <sup>b</sup> |
| No pneumonia                                            | 197 (70.9%)    | 1,261 (75.5%)  |                      | 197 (70.9%)     | 5,559 (80.9%)      |                      |
| Pneumonia                                               | 81 (29.1%)     | 410 (24.5%)    |                      | 81 (29.1%)      | 1,314 (19.1%)      |                      |
| <b>Presence of Danger Sign (n (%))</b>                  |                |                |                      |                 |                    |                      |
|                                                         | 9 (3.2%)       | 47 (2.8%)      | 0.7                  | 9 (3.2%)        | 162 (2.4%)         | 0.3                  |
| <b>Body Temperature (Mean (SD))</b>                     |                |                |                      |                 |                    |                      |
|                                                         | 38.1 (0.8)     | 38.0 (0.8)     | 0.5                  | 38.1 (0.8)      | 38.1 (0.9)         | 0.6                  |
| <b>Duration of Hospitalization (days, Median (IQR))</b> |                |                |                      |                 |                    |                      |
|                                                         | 5.0 (3.0, 6.0) | 5.0 (4.0, 7.0) | 0.10                 | 5.0 (3.0, 6.0)  | 4.0 (3.0, 6.0)     | <0.001               |
| <b>Onset to Hospitalization (days, Median (IQR))</b>    |                |                |                      |                 |                    |                      |
|                                                         | 2.0 (1.0, 4.0) | 3.0 (2.0, 4.0) | 0.042                | 2.0 (1.0, 4.0)  | 2.0 (1.0, 4.0)     | 0.8                  |
| Unknown                                                 | 45             | 216            |                      | 45              | 806                |                      |
| <b>Onset to Discharge (days, Median (IQR))</b>          |                |                |                      |                 |                    |                      |
|                                                         | 7 (5, 9)       | 8 (6, 10)      | 0.002                | 7.0 (5.0, 9.0)  | 7.0 (5.0, 10.0)    | 0.2                  |
| Unknown                                                 | 45             | 216            |                      | 45              | 806                |                      |

<sup>a</sup>Kruskal-Wallis rank sum test; Fisher's Exact Test for Count Data with simulated p-value (based on 2000 replicates); Pearson's Chi-squared test; Fisher's exact test; Wilcoxon rank sum test

<sup>b</sup>Kruskal-Wallis rank sum test; Pearson's Chi-squared test; Fisher's exact test; Wilcoxon rank sum test

Abbreviations: IQR, interquartile range; hMPV, human metapneumovirus-positive group, RSV: respiratory syncytial virus-positive group, Non-RSV: human metapneumovirus–respiratory syncytial virus double-negative group

**Supplementary Table 2. Comparison between hMPV patients with or without co-detected virus**

| Supplementary Table 2                  |                   |                             |                   |                      |
|----------------------------------------|-------------------|-----------------------------|-------------------|----------------------|
| Characteristics                        | Overall, N = 278  | hMPV with Co-detected Virus |                   | p-value <sup>a</sup> |
|                                        |                   | No, N = 201                 | Yes, N = 77       |                      |
| <b>Age Month (Median (IQR))</b>        | 21.0 (12.7, 32.5) | 22.9 (12.7, 35.0)           | 18.9 (13.0, 26.8) | 0.044                |
| <b>Age Group (n (%))</b>               |                   |                             |                   | 0.052                |
| 1-5mo                                  | 13 (4.7%)         | 11 (5.5%)                   | 2 (2.6%)          |                      |
| 6-11mo                                 | 29 (10.4%)        | 20 (10.0%)                  | 9 (11.7%)         |                      |
| 12-23mo                                | 93 (33.5%)        | 56 (27.9%)                  | 37 (48.1%)        |                      |
| 24-35mo                                | 69 (24.8%)        | 53 (26.4%)                  | 16 (20.8%)        |                      |
| 36-47mo                                | 22 (7.9%)         | 19 (9.5%)                   | 3 (3.9%)          |                      |
| 48-59mo                                | 16 (5.8%)         | 14 (7.0%)                   | 2 (2.6%)          |                      |
| ≥60mo                                  | 36 (12.9%)        | 28 (13.9%)                  | 8 (10.4%)         |                      |
| <b>Sex (n (%))</b>                     |                   |                             |                   | <0.001               |
| Male                                   | 152 (54.7%)       | 97 (48.3%)                  | 55 (71.4%)        |                      |
| Female                                 | 126 (45.3%)       | 104 (51.7%)                 | 22 (28.6%)        |                      |
| <b>Cough (n (%))</b>                   | 277 (99.6%)       | 200 (99.5%)                 | 77 (100.0%)       | >0.9                 |
| <b>Difficulty of Breathing (n (%))</b> | 98 (35.3%)        | 68 (33.8%)                  | 30 (39.0%)        | 0.4                  |
| <b>Tachypnea (n (%))</b>               | 201 (72.3%)       | 150 (74.6%)                 | 51 (66.2%)        | 0.2                  |
| <b>Chest Indrawing (n (%))</b>         | 18 (6.5%)         | 11 (5.5%)                   | 7 (9.1%)          | 0.3                  |
| <b>Stridor (n (%))</b>                 | 4 (1.4%)          | 3 (1.5%)                    | 1 (1.3%)          | >0.9                 |
| <b>Wheeze (n (%))</b>                  | 150 (54.0%)       | 105 (52.2%)                 | 45 (58.4%)        | 0.4                  |
| <b>Crackle (n (%))</b>                 | 52 (18.7%)        | 38 (18.9%)                  | 14 (18.2%)        | 0.9                  |
| <b>Clinical Pneumonia (n (%))</b>      |                   |                             |                   | 0.10                 |
| No pneumonia                           | 197 (70.9%)       | 148 (73.6%)                 | 49 (63.6%)        |                      |
| Pneumonia                              | 81 (29.1%)        | 53 (26.4%)                  | 28 (36.4%)        |                      |
| <b>Presence of Danger Sign (n (%))</b> | 9 (3.2%)          | 5 (2.5%)                    | 4 (5.2%)          | 0.3                  |

Supplementary Table 2

| Characteristics                                                 | Overall, N = 278 | hMPV with Co-detected Virus |                 | p-value <sup>a</sup> |
|-----------------------------------------------------------------|------------------|-----------------------------|-----------------|----------------------|
|                                                                 |                  | No, N = 201                 | Yes, N = 77     |                      |
| <b>Body Temperature<br/>(Mean (SD))</b>                         | 38.1 (0.8)       | 38.0 (0.9)                  | 38.2 (0.8)      | 0.2                  |
| <b>Duration of<br/>Hospitalization (days,<br/>Median (IQR))</b> | 5.0 (3.0, 6.0)   | 5.0 (4.0, 6.0)              | 4.0 (3.0, 6.0)  | 0.022                |
| <b>Onset to<br/>Hospitalization (days,<br/>Median (IQR))</b>    | 2.0 (1.0, 4.0)   | 2.0 (1.0, 3.0)              | 3.0 (1.0, 5.0)  | 0.2                  |
| Unknown                                                         | 45               | 33                          | 12              |                      |
| <b>Onset to Discharge<br/>(days, Median (IQR))</b>              | 7.0 (5.0, 9.0)   | 7.0 (6.0, 9.0)              | 7.0 (5.0, 11.0) | 0.8                  |
| Unknown                                                         | 45               | 33                          | 12              |                      |

<sup>a</sup>Kruskal-Wallis rank sum test; Fisher's Exact Test for Count Data with simulated p-value (based on 2000 replicates); Pearson's Chi-squared test; Fisher's exact test; Wilcoxon rank sum test

Abbreviations: IQR, interquartile range; hMPV, human metapneumovirus

**Supplementary Table 3. Association between subgroup, genotypes, and sublineage and wheeze frequency adjusted for age months.**

| Supplementary Table 3 |        |         |                 |                     |         |                |         |                 |                     |         |                        |         |                 |                     |              |
|-----------------------|--------|---------|-----------------|---------------------|---------|----------------|---------|-----------------|---------------------|---------|------------------------|---------|-----------------|---------------------|--------------|
| Characteristic        | A vs B |         |                 |                     |         | A2 vs B1 vs B2 |         |                 |                     |         | A2b vs A2c vs B1 vs B2 |         |                 |                     |              |
|                       | N      | Event N | OR <sup>a</sup> | 95% CI <sup>a</sup> | p-value | N              | Event N | OR <sup>a</sup> | 95% CI <sup>a</sup> | p-value | N                      | Event N | OR <sup>a</sup> | 95% CI <sup>a</sup> | p-value      |
| <b>Age Months</b>     | 145    | 77      | 1.00            | 0.98, 1.02          | >0.9    | 145            | 77      | 1.00            | 0.98, 1.02          | >0.9    | 145                    | 77      | 1.00            | 0.98, 1.02          | 0.9          |
| <b>Subgroup</b>       |        |         |                 |                     |         |                |         |                 |                     |         |                        |         |                 |                     |              |
| A                     | 106    | 60      | —               | —                   |         |                |         |                 |                     |         |                        |         |                 |                     |              |
| B                     | 39     | 17      | 0.59            | 0.28, 1.24          | 0.2     |                |         |                 |                     |         |                        |         |                 |                     |              |
| <b>Genotype</b>       |        |         |                 |                     |         |                |         |                 |                     |         |                        |         |                 |                     |              |
| B1                    |        |         |                 |                     |         | 26             | 11      | —               | —                   |         |                        |         |                 |                     |              |
| B2                    |        |         |                 |                     |         | 13             | 6       | 1.17            | 0.30, 4.52          | 0.8     |                        |         |                 |                     |              |
| A2                    |        |         |                 |                     |         | 106            | 60      | 1.78            | 0.75, 4.34          | 0.2     |                        |         |                 |                     |              |
| <b>Sublineage</b>     |        |         |                 |                     |         |                |         |                 |                     |         |                        |         |                 |                     |              |
| B1                    |        |         |                 |                     |         |                |         |                 |                     |         | 26                     | 11      | —               | —                   |              |
| B2                    |        |         |                 |                     |         |                |         |                 |                     |         | 13                     | 6       | 1.17            | 0.30, 4.51          | 0.8          |
| A2c                   |        |         |                 |                     |         |                |         |                 |                     |         | 76                     | 37      | 1.29            | 0.52, 3.23          | 0.6          |
| A2b                   |        |         |                 |                     |         |                |         |                 |                     |         | 30                     | 23      | 4.48            | 1.46, 14.9          | <b>0.011</b> |

<sup>a</sup>OR = Odds Ratio, CI = Confidence Interval



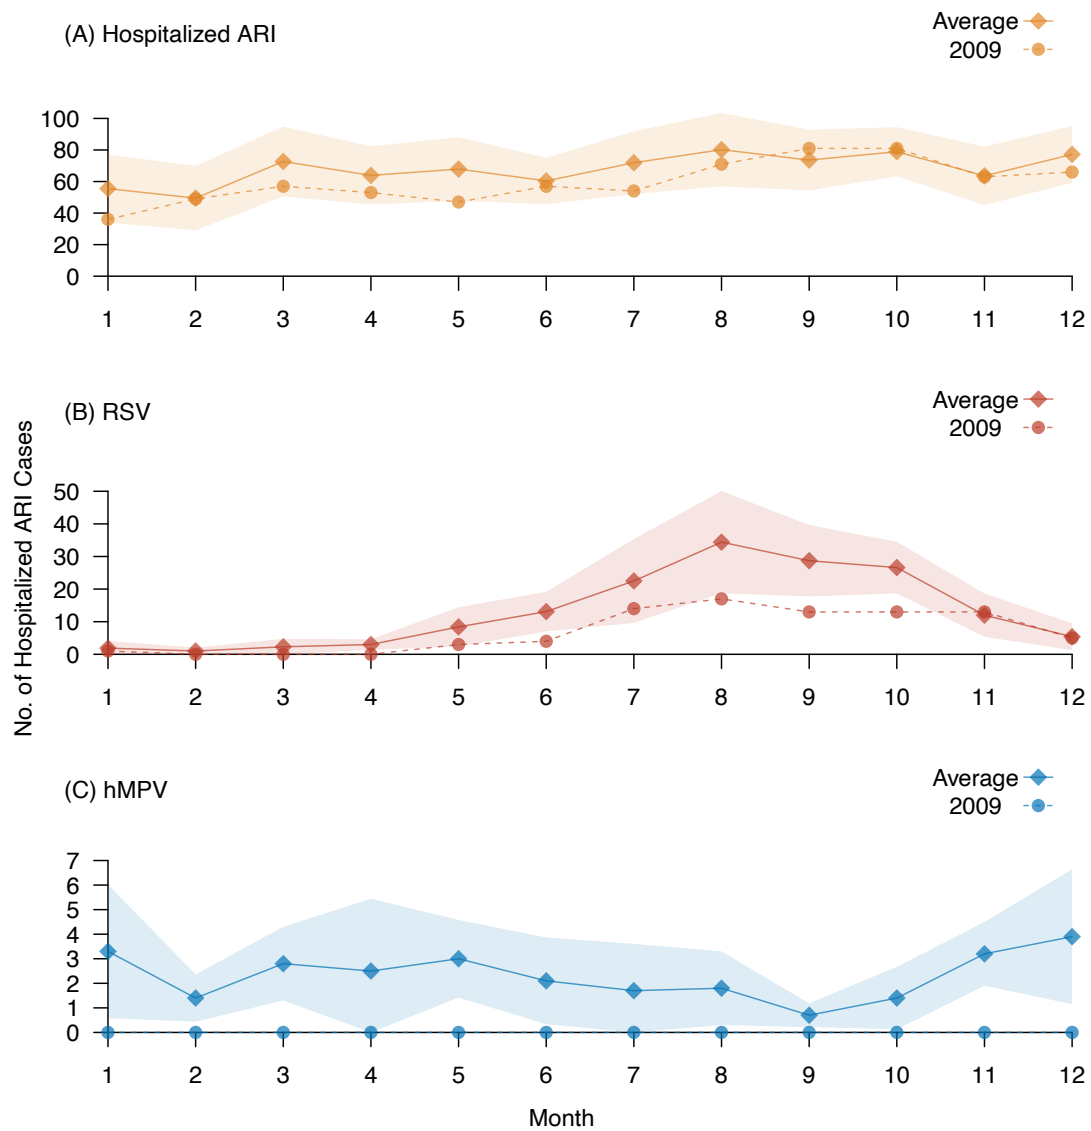

**Supplementary Figure 1**

The monthly number of cases for (A) hospitalized ARI, (B) RSV-positive, and (C) hMPV-positive. The solid lines with diamonds show the monthly average cases from 2007 to 2017 with the 95% confidence interval, except for 2009. The dashed lines with circles show the number of hospitalized ARI cases in 2009.
